# Supplementary material for: A highly mutable GST is essential for bract colouration in Euphorbia pulcherrima Willd. Ex Klotsch
Source: BMC Genomics. 2021 Mar 23;22:208. doi: 10.1186/s12864-021-07527-z (PMC7988969; doi:10.1186/s12864-021-07527-z)
Supplement: Supplementary file 4 — Additional file 4. List of primers used in each of the analyses in the present study. [file 12864_2021_7527_MOESM4_ESM.xlsx]

## Sheet: Sheet1
Additional File S4. List of primers used in each of the analyses in the present study.
Primer name	Sequence	Fragment size (bp)	Target sequence
Sanger sequencing
EpGST_F1	TCCGATCTAAGAAATCAAGGCTA	2,368 / 695	Full-length gene (gDNA) / full-length CDS (cDNA)
EpGST_R1	CAGTCGGCCGCTACATAGAT
EpGST_F2	TGGCCTGCCTTTTAGAGAAA	596	1st intron, 1st exon (partially), 2nd exon (partially)
EpGST_R2	AAAGCCTGAAATCCCCATCT
EpGST_F2	TGGCCTGCCTTTTAGAGAAA	1933	2nd intron, 2nd exon (partially), 3rd exon (partially)
EpGST_R3	TATGGGCTTCCACTTCAACC
Genotyping
EpGST_F3	GTAAAACGACGGCCAGTTGGCCTGCCTTTTAGAGAAA	197	CTTC3 SSR locus in the 1st exon
EpGST_R4	ACAAGTTCAGGGGGCTGAG
FAM labelled M13	FAM-GTAAAACGACGGCCAGT
RT-qPCR
EpGST_qPCR_F	CTTGTTCATGAGCTTGGGTTAG	~ 80	EpGST
EpGST_qPCR_R	CGGTCGGTCCGATATATCAAT
EF1B_qPCR_F	GGAGATGAGACTGAGGAGGATAA	~ 120	Translation elongation factor 1 beta – EF1B
EF1B_qPCR_R	CCCACGGCTTTACATCCAATA
EF1A_qPCR_F	AAGATGATTCCCACCAAGCCCA	~ 120	Translation elongation factor 1 alpha – EF1A
EF1A_qPCR_R	CACAGCAAAACGACCCAGAGGA
InFusion Cloning
Ep_infusion_GST_F	GACACTAGTTGGATCTCCGATCTAAGAAATCAAGGCTA	725	Full-length CDS (cDNA)
Ep_infusion_GST_R	CGACACGCGTAAGCTCAGTCGGCCGCTACATAGAT
